# Supplementary material for: Quantitative Profiling of WNT-3A Binding to All Human Frizzled Paralogues in HEK293 Cells by NanoBiT/BRET Assessments
Source: PubMed Central journal article supplement (PMC8205236; doi:10.1021/acsptsci.1c00084), 2021-05-11
Supplement: pt1c00084_si_001.pdf [file pt1c00084_si_001.pdf]

## Supporting Information

### Quantitative Profiling of WNT-3A Binding to All Human Frizzled Paralogues in HEK293 Cells by NanoBiT/BRET Assessments

*Pawel Kozielowicz\**, *Rawan Shekhani*, *Stefanie Moser*, *Carl-Fredrik Bowin*, *Janine Wesslowski*, *Gary Davidson\** and *Gunnar Schulte\**

Corresponding Authors:

**Pawel Kozielowicz** - Section of Receptor Biology & Signaling, Dept. Physiology & Pharmacology, Karolinska Institutet, S-17165, Stockholm, Sweden; pawel.kozielowicz@ki.se

**Gary Davidson** – Institute of Biological and Chemical Systems-Functional Molecular Systems (IBCS-FMS), Karlsruhe Institute of Technology (KIT), Karlsruhe, Germany; gary.davidson@kit.edu

**Gunnar Schulte** - Section of Receptor Biology & Signaling, Dept. Physiology & Pharmacology, Karolinska Institutet, S-17165, Stockholm, Sweden; gunnar.schulte@ki.se

Authors:

**Rawan Shekhani** – Section of Receptor Biology & Signaling, Dept. Physiology & Pharmacology, Karolinska Institutet, S-17165, Stockholm, Sweden

**Stefanie Moser** – Institute of Biological and Chemical Systems-Functional Molecular Systems (IBCS-FMS), Karlsruhe Institute of Technology (KIT), Karlsruhe, Germany

**Carl-Fredrik Bowin** – Section of Receptor Biology & Signaling, Dept. Physiology & Pharmacology, Karolinska Institutet, S-17165, Stockholm, Sweden

**Janine Wesslowski** – Institute of Biological and Chemical Systems-Functional Molecular Systems (IBCS-FMS), Karlsruhe Institute of Technology (KIT), Karlsruhe, Germany

**Table of content:**

**Supplementary Figure 1.** Characteristics of HiBiT-FZD constructs used in this study

**Supplementary Figure 2.** eGFP-WNT-3A binding to FZD<sub>6</sub> and FZD<sub>8</sub> with enlarged scale

**Supplementary Figure 3.** eGFP-WNT-3A binding comparison between Nluc-FZD<sub>4</sub> and HiBiT-FZD<sub>4</sub>

**Supplementary Figure 4.** Construct validation of FZD-FZD and FZD-CD86 fusion proteins. Analysis of correlation between receptor expression levels and ligand affinity. eGFP-WNT-3A saturation binding to FZD-FZD chimeras.

**Supplementary Figure 5.** Validation of eGFP-WNT-3A conditioned media (CM)

A

HiBiT-FZD

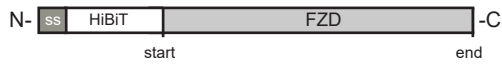

B

| plasmid                 | source of ORF                                             | FZD start | FZD end |
|-------------------------|-----------------------------------------------------------|-----------|---------|
| HiBiT-FZD <sub>1</sub>  | synthetic from Twist Bioscience                           | Q73       | V647    |
| HiBiT-FZD <sub>2</sub>  | synthetic from IDT                                        | F24       | V565    |
| HiBiT-FZD <sub>3</sub>  | mutated from mouse FZD <sub>3</sub> -GFP (Jeremy Nathans) | H23       | A666    |
| HiBiT-FZD <sub>4</sub>  | FZD <sub>4</sub> -Cerulean <sup>1</sup>                   | F37       | V537    |
| HiBiT-FZD <sub>5</sub>  | synthetic HA-FZD <sub>5</sub> (Thomas Sakmar)             | A27       | V585    |
| HiBiT-FZD <sub>6</sub>  | SNAP-FZD <sub>6</sub> (Madelon Maurice)                   | H19       | T706    |
| HiBiT-FZD <sub>7</sub>  | SNAP-FZD <sub>7</sub> (Heptares)                          | Q33       | V574    |
| HiBiT-FZD <sub>8</sub>  | synthetic from IDT                                        | A28       | V694    |
| HiBiT-FZD <sub>9</sub>  | FZD <sub>9</sub> -GFP (OriGene)                           | L23       | L591    |
| HiBiT-FZD <sub>10</sub> | FZD <sub>10</sub> -GFP <sup>2</sup>                       | I21       | V581    |

C

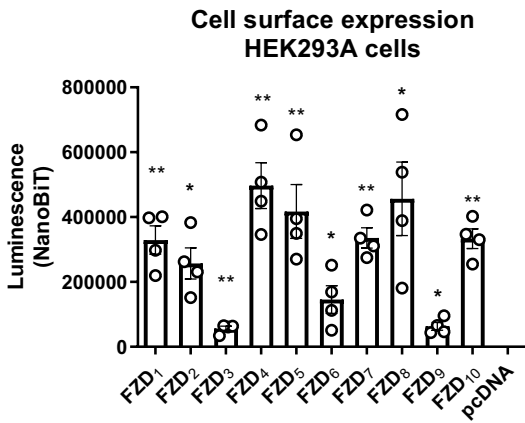

D

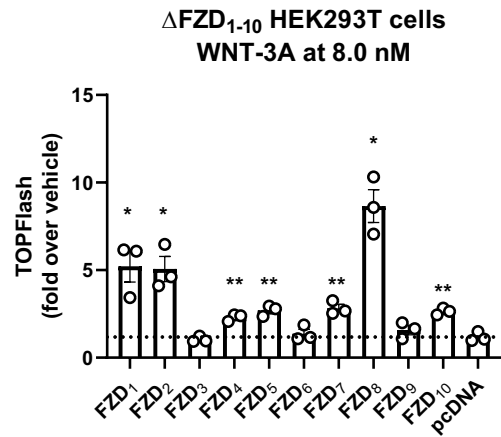

Fig. S1

**Supplementary Figure 1. Characteristics of HiBiT-FZD constructs used in this study.**

**A.** Schematic representation of HiBiT-FZDs used to study eGFP-WNT-3A binding. ss – signal sequence. **B.** Source of receptor plasmid cDNA used to generate the N-terminally HiBiT-tagged constructs. First and last amino acids of each Frizzled protein are shown. **C.** Cell surface expression of HiBiT-FZDs as measured by NanoBiT luminescence (from the experiments summarised in **Figure 2B**). Data are presented as means  $\pm$  SEM from  $n = 4$  individual experiments. **D.** TOPFlash reporter activity of transiently overexpressed HiBiT-FZD<sub>1-10</sub> in  $\Delta$ FZD<sub>1-10</sub> HEK293T cells was assessed following 24hr stimulation with commercially-available untagged WNT-3A (8.0 nM) in the presence of 10 nM C59 in the serum-free conditions. Data are presented as means  $\pm$  SEM from  $n = 3$  individual experiments. TOPFlash and cell surface expression data were analyzed for differences with Brown-Forsythe and Welch one-way analysis of variance (ANOVA); \*\*  $P \leq 0.01$ , \*  $P \leq 0.05$ .

A

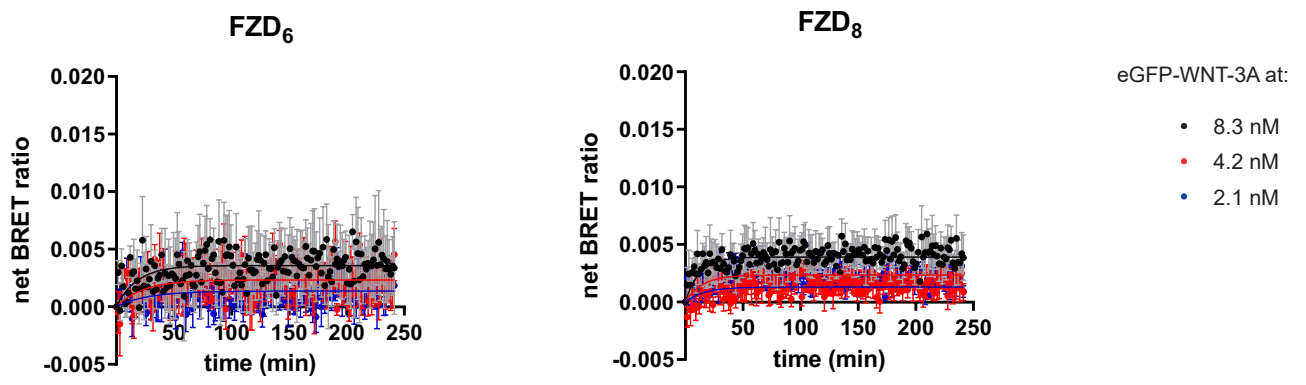

B

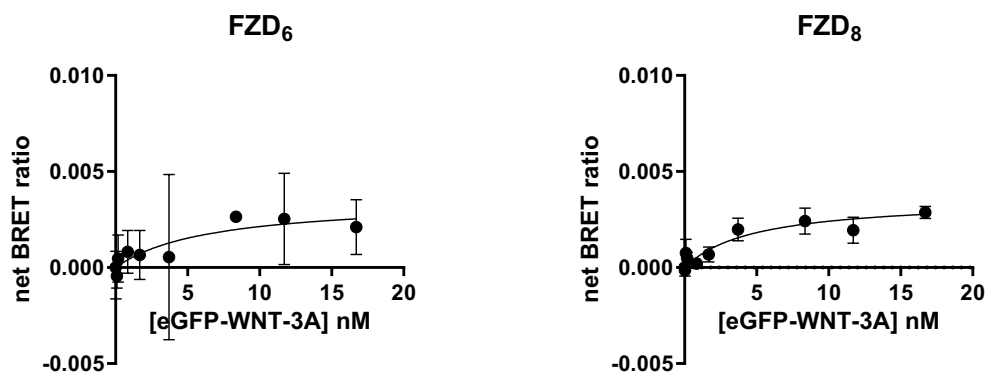

Fig. S2

**Supplementary Figure 2. eGFP-WNT-3A binding to FZD<sub>6</sub> and FZD<sub>8</sub>** **A.** Plots with association binding to FZD<sub>6</sub> and FZD<sub>8</sub> from **Figure 1** are presented with the enlarged scale on the y-axis to confirm weak but detectable NanoBiT/BRET signal. **B.** Plots with saturation binding to FZD<sub>6</sub> and FZD<sub>8</sub> from **Figure 2** are presented with the enlarged scale on the y-axis to confirm weak but detectable NanoBiT/BRET signal.

A

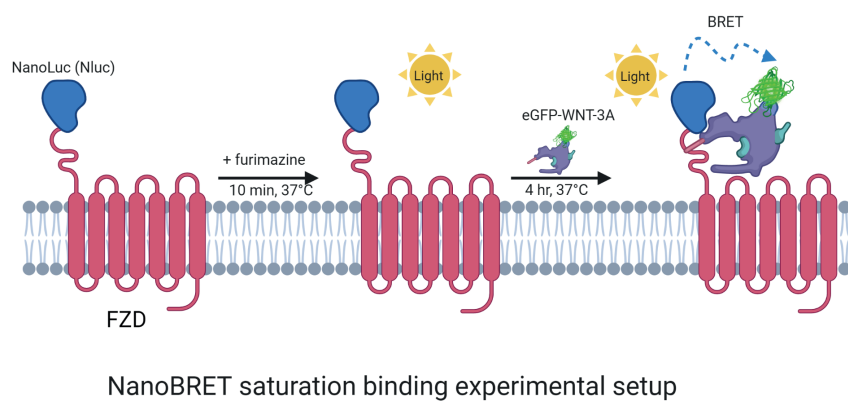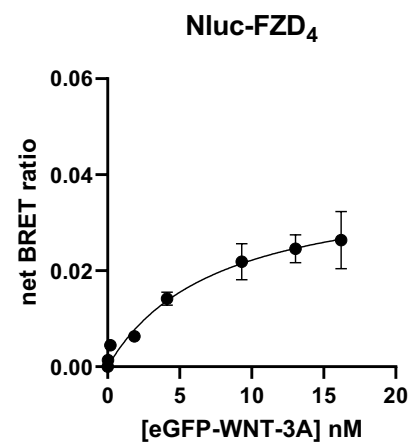

B

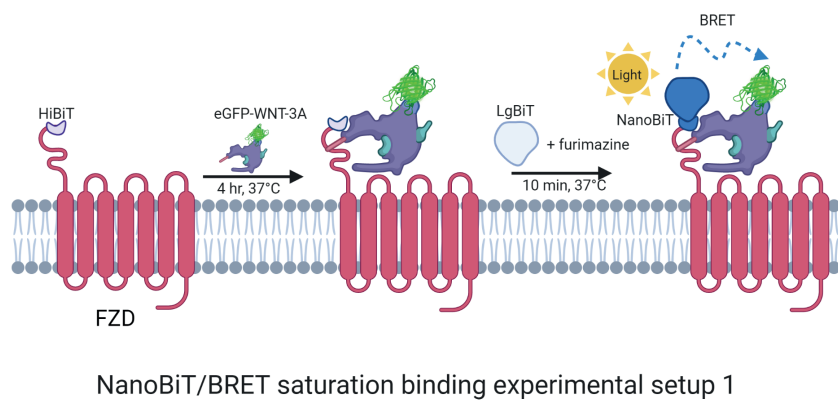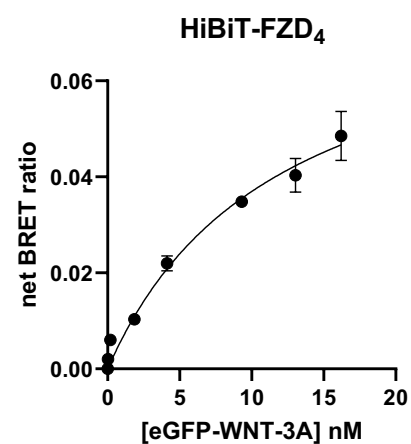

C

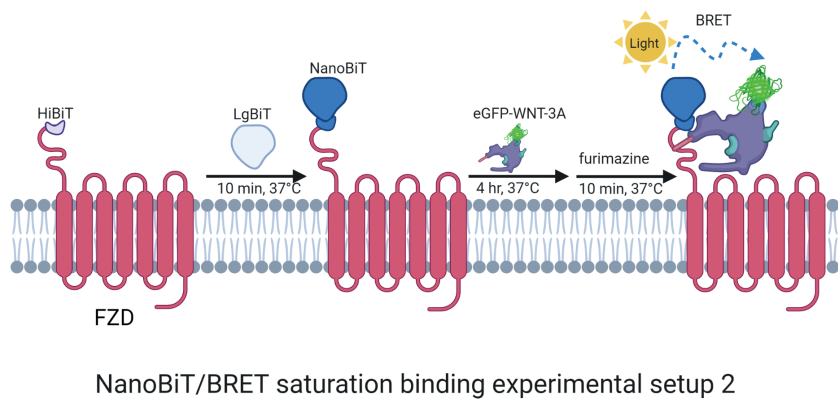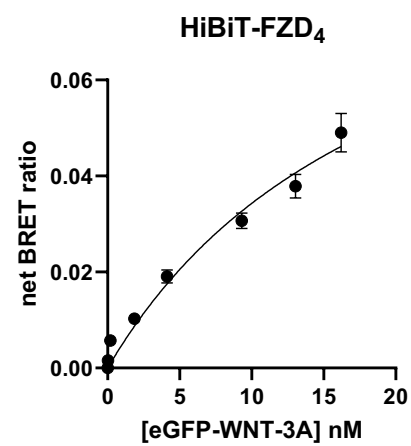

D

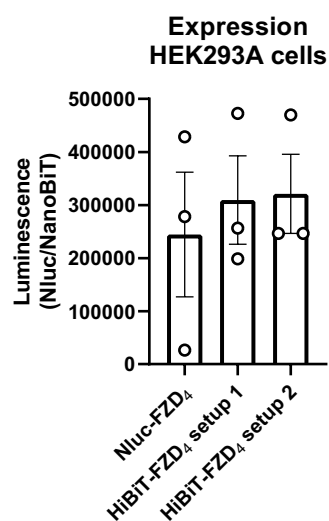

Fig. S3

**Supplementary Figure 3. eGFP-WNT-3A binding affinity to Nluc-FZD<sub>4</sub> and HiBiT-FZD<sub>4</sub>**

**is similar. A. Left.** The scheme depicts the experimental set up of NanoBRET analysis of equilibrium binding between the Nluc-FZD<sub>4</sub> and the eGFP-WNT-3A. Created with BioRender.com. **Right.** Saturation binding of the eGFP-WNT-3A to human Nluc-FZD<sub>4</sub> was determined by the detection of NanoBRET in transiently overexpressing living HEK293A cells following 240 min incubation. Data points are presented as means  $\pm$  SEM from  $n = 3$  individual experiments, fitting a one-site specific binding model. **B. Left.** The scheme depicts the experimental set up 1 of NanoBiT/BRET analysis of equilibrium binding between the HiBiT-FZD<sub>4</sub> and the eGFP-WNT-3A as used in the saturation binding experiments throughout this study. LgBiT and furimazine were added after 240 min incubation with the fluorescent probe. Created with BioRender.com. **Right.** Saturation binding of the eGFP-WNT-3A to human Nluc-FZD<sub>4</sub> was determined by the detection of NanoBRET in transiently overexpressing living HEK293A cells following the 240 min incubation. Data points are presented as means  $\pm$  SEM from  $n = 3$  individual experiments, fitting a one-site specific binding model. **C. Left.** The scheme depicts the experimental set up 2 of NanoBiT/BRET analysis of equilibrium binding between the HiBiT-FZD<sub>4</sub> and the eGFP-WNT-3A as used in the saturation binding experiments throughout this study. LgBiT and furimazine were prior to the 240 min incubation with the fluorescent probe. Created with BioRender.com. **Right.** Saturation binding of the eGFP-WNT-3A to human Nluc-FZD<sub>4</sub> was determined by the detection of NanoBRET in transiently overexpressing living HEK293A cells following 240 min incubation. Data points are presented as means  $\pm$  SEM from  $n = 3$  individual experiments, fitting a one-site specific binding model. **D.** Cell surface expression of Nluc-FZD<sub>4</sub> and HiBiT-FZD<sub>4</sub> from the two experimental setups as measured by Nanoluc or NanoBiT luminescence. Data are presented as means  $\pm$  SEM from  $n = 3$  individual experiments. Experiments were performed with eGFP-WNT-3A batch 2.



A

## HiBiT-FZD-FZD and HiBiT-FZD-CD86

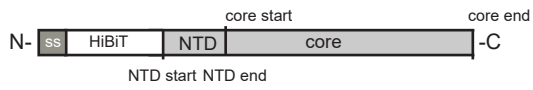

| plasmid                                                     | NTD start-end | core start-end |
|-------------------------------------------------------------|---------------|----------------|
| HiBiT-FZD <sub>4</sub> -FZD <sub>6</sub>                    | F37-Y211      | K191-T706      |
| HiBiT-FZD <sub>4</sub> -FZD <sub>8</sub>                    | F37-Y211      | S270-V694      |
| HiBiT-FZD <sub>4</sub> -CD86<br>(CD86<br>Uniprot ID:P42081) | F37-Y211      | A24-R277       |
| HiBiT-FZD <sub>5</sub> -FZD <sub>6</sub>                    | A27-F227      | K191-T706      |
| HiBiT-FZD <sub>5</sub> -FZD <sub>7</sub>                    | A27-F227      | K246-V574      |
| HiBiT-FZD <sub>6</sub> -FZD <sub>4</sub>                    | H19-F190      | S212-V537      |
| HiBiT-FZD <sub>6</sub> -CD86<br>(CD86<br>Uniprot ID:P42081) | A28-F269      | A24-R277       |

B

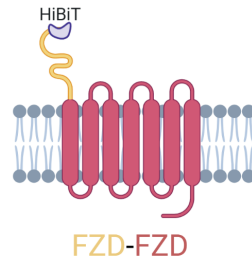

C

Cell surface expression  
HEK293A cells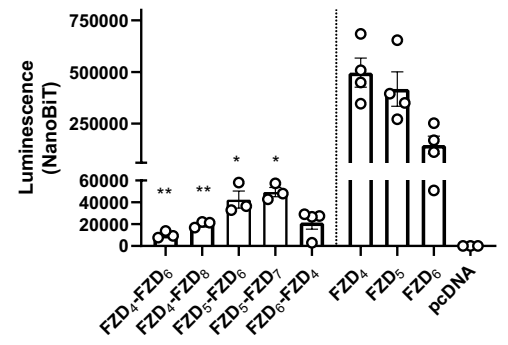

D

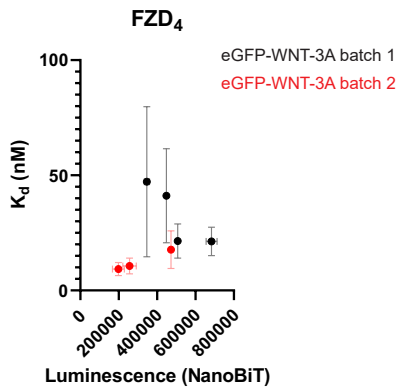

E

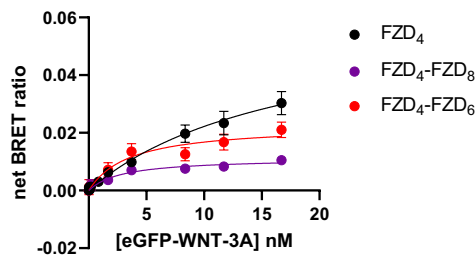

F

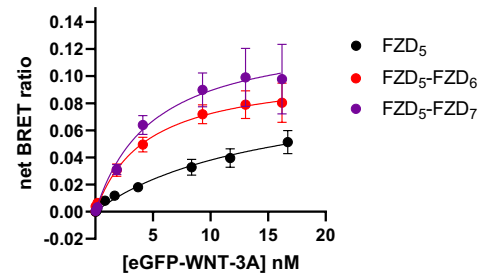

G

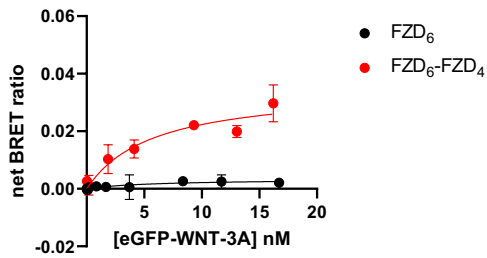

Fig. S4

**Supplementary Figure 4. Construct validation of FZD-FZD and FZD-CD86 fusion proteins. Analysis of correlation between receptor expression levels and ligand affinity. eGFP-WNT-3A saturation binding to FZD-FZD chimeras.** **A.** Details of HiBiT-FZD-FZD and HiBiT-FZD-CD86 constructs used to study eGFP-WNT-3A binding. First and last amino acids of FZD N-terminal domain (NTD) and FZD core or CD86 for each construct are shown. ss- signal sequence. **B.** Cartoon representation of HiBiT-FZD- constructs used to study eGFP-WNT-3A binding. Created with BioRender.com. **C.** Cell surface expression of HiBiT-tagged FZD-FZD chimeras as measured by NanoBiT luminescence (from the experiments summarised in **Figure 2B** and **4B-D**). Data are presented as means  $\pm$  SEM from  $n = 3-4$  individual experiments. Expression data of FZD<sub>4</sub>, FZD<sub>5</sub>, FZD<sub>6</sub> and pcDNA are also depicted in **Supplementary Figure 1C**. Statistical analysis was performed for FZD<sub>4</sub>-FZD<sub>6</sub> vs FZD<sub>4</sub>, FZD<sub>4</sub>-FZD<sub>8</sub> vs FZD<sub>4</sub>, FZD<sub>5</sub>-FZD<sub>6</sub> vs FZD<sub>5</sub>, FZD<sub>5</sub>-FZD<sub>7</sub> vs FZD<sub>5</sub> and FZD<sub>6</sub>-FZD<sub>4</sub> vs FZD<sub>6</sub> comparisons. **D.** Correlation between HiBiT-FZD<sub>4</sub> expression upon transient overexpression in HEK293A cells and corresponding  $K_d$  of eGFP-WNT-3A (batch 1 in black, batch 2 in red). Data come from individual experiments (mean  $\pm$  SD) that were pooled and presented in **Figure 2B** and **Supplementary Figure 3B**. **E.** Saturation binding of eGFP-WNT-3A at FZD<sub>4</sub>-FZD<sub>6</sub>, FZD<sub>4</sub>-FZD<sub>8</sub> and FZD<sub>4</sub> (data also present in **Figure 2B**) was determined by the detection of NanoBiT/BRET in transiently overexpressing living HEK293A cells following 240 min incubation. Data points are presented as means  $\pm$  SEM from  $n = 3-4$  individual experiments. eGFP-WNT-3A batch 1 was used in these experiments. **F.** Saturation binding of eGFP-WNT-3A at FZD<sub>5</sub>-FZD<sub>6</sub>, FZD<sub>5</sub>-FZD<sub>7</sub> and FZD<sub>5</sub> (data also present in **Figure 2B**) was determined by the detection of NanoBiT/BRET in transiently overexpressing living HEK293A cells following 240 min incubation. Data points are presented as means  $\pm$  SEM from  $n = 3-4$  individual experiments. eGFP-WNT-3A batch 2 was used in the experiments with FZD<sub>5</sub>-FZD<sub>6</sub> and FZD<sub>5</sub>-FZD<sub>7</sub>, and eGFP-WNT-3A batch 1 was used in the experiments with FZD<sub>5</sub>.

**G.** Saturation binding of eGFP-WNT-3A at FZD<sub>6</sub>-FZD<sub>4</sub> and FZD<sub>6</sub> (data also present in **Figure 2B**) was determined by the detection of NanoBiT/BRET in transiently overexpressing living HEK293A cells following 240 min incubation. Data points are presented as means  $\pm$  SEM from  $n = 3-4$  individual experiments. eGFP-WNT-3A batch 2 was used in the experiments with FZD<sub>6</sub>-FZD<sub>4</sub>, and eGFP-WNT-3A batch 1 was used in the experiments with FZD<sub>6</sub>.

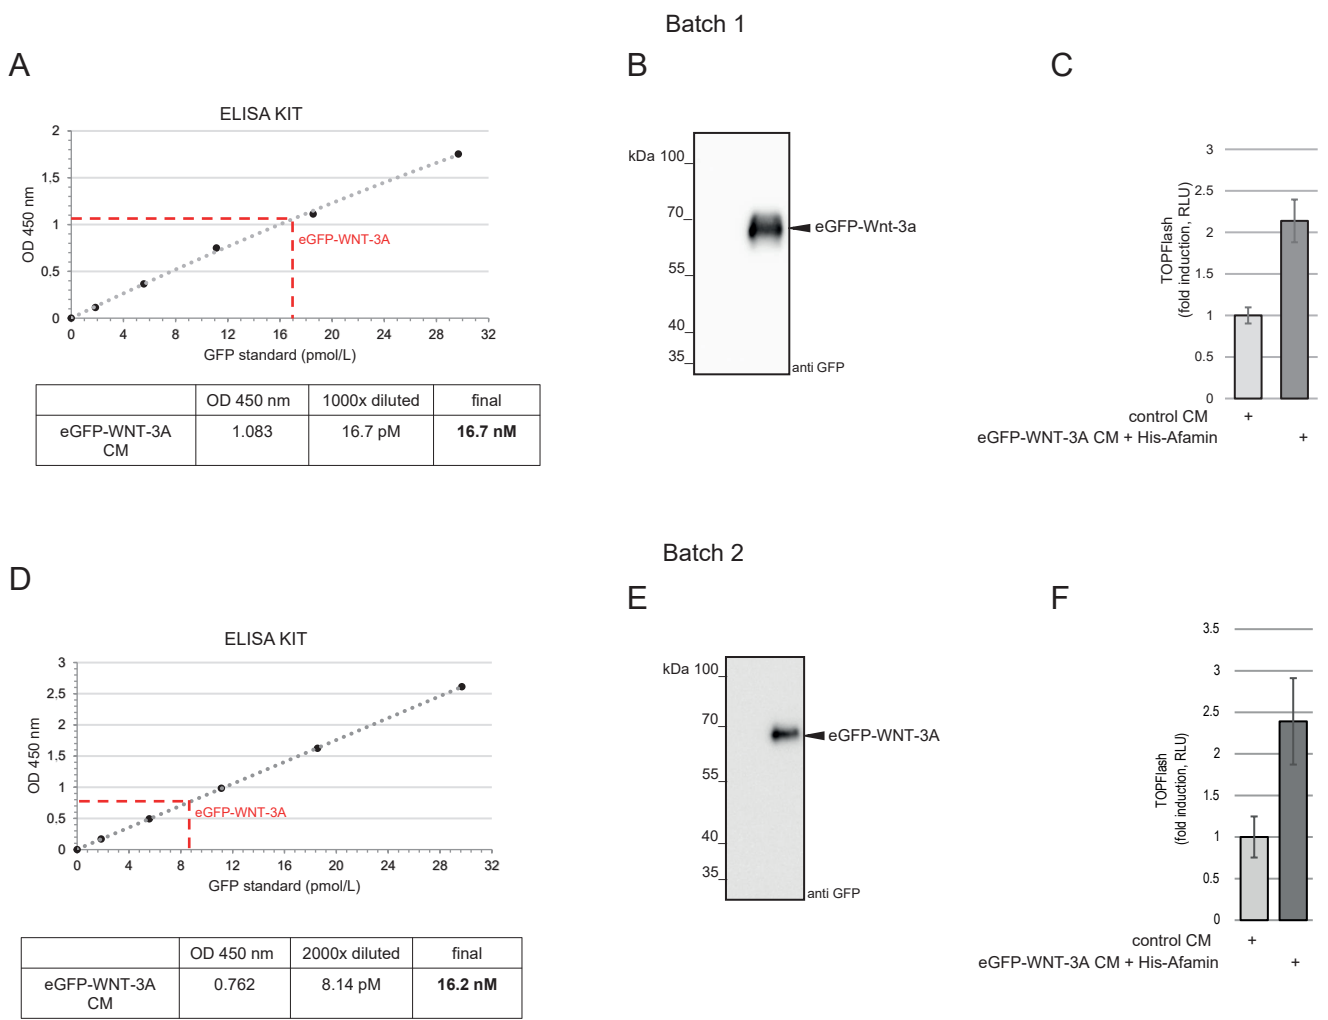

Fig. S5

**Supplementary Figure 5. Validation of eGFP-WNT-3A conditioned media (CM) Batch 1 and Batch 2 used in this study. A, D.** GFP ELISA assay (GFP ELISA<sup>®</sup> kit, Abcam, ab171581) to determine the concentration of eGFP-WNT-3A present in each CM preparation. **B, E.** Western blotting (anti GFP, Santa Cruz Biotechnology, sc-9996) confirming presence of soluble full length eGFP-WNT-3A in the CM. **C, F.** TOPFlash TCF reporter assay showing activity of the indicated CM in HEK293T cells.

References:

- [1] Arthofer, E., Hot, B., Petersen, J., Strakova, K., Jager, S., Grundmann, M., Kostenis, E., Gutkind, J. S., and Schulte, G. (2016) WNT Stimulation Dissociates a Frizzled 4 Inactive-State Complex with Galpha12/13, *Mol Pharmacol* 90, 447-459.
- [2] Hot, B., Valnohova, J., Arthofer, E., Simon, K., Shin, J., Uhlen, M., Kostenis, E., Mulder, J., and Schulte, G. (2017) FZD10-Galalpha13 signalling axis points to a role of FZD10 in CNS angiogenesis, *Cell Signal* 32, 93-103.
